# Supplementary material for: Accuracy of augmented reality navigated surgery for placement of zygomatic implants: a human cadaver study
Source: PeerJ. 2024 Dec 9;12:e18468. doi: 10.7717/peerj.18468 (PMC11636531; doi:10.7717/peerj.18468)
Supplement: Supplemental Information 1 — Accuracy Measurements for the implant accuracy of the zygomatic implants per implant per cadaver. [file peerj-12-18468-s001.xlsx]

## Sheet: Kadavers
	Naam		impl Re	impl Li	analyse opmerking	ICP error (1mm threshold)			Abutment (mm)				Entry point (mm)				Exit point (mm)				Abbutment accuracy 2D				Abbutment hight occlusion plane				axial angle				coronal angle				sagital angle				3D angle
									LI VENT	LI DORS	RE VENT	RE DORS	LI VENT	LI DORS	RE VENT	RE DORS	LI VENT	LI DORS	RE VENT	RE DORS	LI VENT	LI DORS	RE VENT	RE DORS	LI VENT	LI DORS	RE VENT	RE DORS	LI VENT	LI DORS	RE VENT	RE DORS	LI VENT	LI DORS	RE VENT	RE DORS	LI VENT	LI DORS	RE VENT	RE DORS	LI VENT	LI DORS	RE VENT	RE DORS
1	Kadaver 1		2	2	RA apex in sinus geplaatst				1.86	0.6	2.22	2.53	2.55	1.74	1.36	3.86	3.07	3.6	2.87	11.65	4.74	2.02	3.04	8.39	1.29	0.77	0.89	3.01	1.48	5.39	4.74	21.63	0.28	1.24	1.48	3.25	1.93	7.93	7.26	25.27	1.39	4.95	4.85	19.16
2	Kadaver 2		2	2					1.21	3.42	2.39	4.61	0.6	1.98	1.43	1.66	2.06	3.48	1.36	1.77	2.43	2.28	3.74	4.91	0.08	2.98	1.74	0.69	1.23	7.72	4.97	6.68	3.4	6.65	1.83	2.87	1.57	17.38	4.04	11.47	3.26	9.97	4.07	6.69
3	Kadaver 3		2	2					2.4	5.32	3.42	1.5	2.15	3.84	2.84	1.17	2.72	3.97	2.51	1.84	2.45	5.43	1.48	1.09	0.21	1.49	4.04	1.26	2.57	9.56	3.12	1.85	3.4	0.63	0.5	3.9	0.54	9.8	4.42	0.39	3.3	8.12	2.8	3.96
4	Kadaver 4		2	2	RV apex in infraorbital rim				7.7	6.06	3.57	1.61	5.1	1.45	1.57	2.32	2.78	2.82	5.46	3.46	8.42	4.84	5.09	1.99	3.93	4.63	2.26	2.47	6.34	9.8	11.96	1.94	4.77	7.63	0.27	2.14	8.25	18.32	12.77	0.75	5.99	11.5	9.61	2.38
5	Kadaver 5		2	2					8.63	1.64	2.05	4.07	5.96	2.12	1.56	3.26	3.58	3.73	1.36	1.48	10.42	5.54	1.23	2.98	3.65	3.89	1.72	3.01	6.54	2.77	1.04	3.92	0.41	1.58	1.45	1.16	8.27	2.76	2.73	6.6	5.59	2.69	1.85	3.86
					Mean	#DIV/0!			4.36	3.408	2.73	2.864	3.272	2.226	1.752	2.454	2.842	3.52	2.712	4.04	5.692	4.022	2.916	3.872	1.832	2.752	2.13	2.088	3.632	7.048	5.166	7.204	2.452	3.546	1.106	2.664	4.112	11.238	6.244	8.896	3.906	7.446	4.636	7.21
					SD	#DIV/0!			3.14333	2.08325	0.635578	1.26866	1.97417	0.838465	0.549742	0.992323	0.495354	0.385902	1.50154	3.86769	3.22036	1.5491	1.43703	2.59102	1.65535	1.44187	1.05098	0.947215	2.33745	2.66028	3.67664	7.42353	1.79209	2.96647	0.608033	0.943411	3.41743	5.8782	3.582	9.15111	1.69078	3.22829	2.69219	6.13493
										MIN	0.6			MIN	0.6			MIN	1.36			MIN	1.09			MIN	0.08			MIN	1.04			MIN	0.27			MIN	0.39			MIN	1.39
			10	10						MAX	8.63			MAX	5.96			MAX	11.65			MAX	10.42			MAX	4.63			MAX	21.63			MAX	7.63			MAX	25.27			MAX	19.16
										MEAN	3.3405			MEAN	2.426			MEAN	3.2785			MEAN	4.1255			MEAN	2.2005			MEAN	5.7625			MEAN	2.442			MEAN	7.6225			MEAN	5.7995
										SD	2.1141			SD	1.33211			SD	2.1655			SD	2.52689			SD	1.34893			SD	4.73794			SD	2.02017			SD	6.55216			SD	4.1172
